# Supplementary material for: Health Risk Assessment of Nitrate and Fluoride in Groundwater Across 10 Nigerian States
Source: Research Square preprint supplement (doi:10.21203/rs.3.rs-7584799/v1), 2025-09-25
Supplement: Supplementary file 1 [file 8f4198217c2a9607d0f25076.docx]

**Health Risk Assessment of Nitrate and Fluoride in Groundwater Across 10 Nigerian States**

Adewole Michael Gbadebo1,2,3, Chukwudi Michael Duru1, Oluwatoyin Oluwaseun Makanjuola1, Oluwajumilo Oluwadara Gbadebo4, Darlington Ogonna Igwe2, Esther Ochuwa Osianor1, Kudirat Korede Otubu1, Gabriel Temitope Adegbanke1, Ifeoluwa Mary Owoola1, Adebisi Aishat Bello1, Taiwo Azeez Egbedara1, Inioluwa Emmanuel Ola-Iya1, Ayotomiwa Dorcas Adesanya1, Oreoluwa Fayokemi Omolafe1, Chukwuebuka Elvis Samuel3, Victor Jimmy Francis3, Tochukwu Kalu Michael3, Benjamin Onozeyi Dimowo1*

**Supplementary Information**

Table S1: Distribution of Groundwater Samples from 82 Communities Across the States of Lagos, Ogun, Oyo, Osun, Ekiti, Ondo, Imo, Ebonyi, Delta and Abuja

| **State** | **Location** | **SC** | **F**- | **NO**3- | **NPI** |
| --- | --- | --- | --- | --- | --- |
| Abuja | Kubwa | AAK 1 | 2.2 | 2.8 | 0.06 |
|  |  | AAK 2 | 2.5 | 2.6 | 0.05 |
|  |  | AAK 3 | 3.6 | 6.8 | 0.14 |
|  |  | AAK 4 | 3.2 | 3.4 | 0.07 |
|  |  | AAK 5 | 4.6 | 2.6 | 0.05 |
|  |  | AAK 6 | 1.6 | 3.5 | 0.07 |
|  |  | AAK 7 | 1.3 | 2.3 | 0.05 |
|  |  | AAK 8 | 3.5 | 3.5 | 0.07 |
|  |  | AAK 9 | 3 | 3 | 0.06 |
|  |  | AAK 10 | 2.4 | 3.6 | 0.07 |
|  |  | AAK 11 | 3.2 | 3 | 0.06 |
|  |  | AAK 12 | 2.1 | 3.2 | 0.06 |
|  |  | AAK 13 | 2.6 | 3.8 | 0.08 |
|  |  | AAK 14 | 2.3 | 4.5 | 0.09 |
|  |  | AAK 15 | 3.6 | 3.8 | 0.08 |
|  | Lokogoma | AAL 1 | 3.2 | 2.6 | 0.05 |
|  |  | AAL 2 | 4.6 | 3 | 0.06 |
|  |  | AAL 3 | 1.6 | 2.4 | 0.05 |
|  |  | AAL 4 | 1.3 | 2.8 | 0.06 |
|  |  | AAL 5 | 1.5 | 2.4 | 0.05 |
|  | Dei - dei | AAD 1 | 1.2 | 2.6 | 0.05 |
|  |  | AAD 2 | 1.3 | 2.4 | 0.05 |
|  |  | AAD 3 | 1.2 | 2.4 | 0.05 |
|  |  | AAD 4 | 1.2 | 2.5 | 0.05 |
|  |  | AAD 5 | 1.2 | 2.7 | 0.05 |
|  |  | AAD 6 | 2.4 | 3.5 | 0.07 |
|  |  | AAD 7 | 2.4 | 2.5 | 0.05 |
|  |  | AAD 8 | 2.5 | 2.3 | 0.05 |
|  |  | AAD 9 | 2.7 | 2 | 0.04 |
|  |  | AAD 10 | 7.3 | 3.1 | 0.06 |
|  | Bwari | AAB 1 | 6.4 | 12.4 | 0.25 |
|  |  | AAB 2 | 7 | 13.1 | 0.26 |
|  |  | AAB 3 | 10.2 | 12.4 | 0.25 |
|  |  | AAB 4 | 7 | 13.1 | 0.26 |
|  |  | AAB 5 | 7.3 | 11 | 0.22 |
|  |  | AAB 6 | 4.5 | 13.1 | 0.26 |
|  |  | AAB 7 | 4.1 | 8.6 | 0.17 |
|  |  | AAB 8 | 3 | 9.5 | 0.19 |
|  |  | AAB 9 | 7.5 | 12 | 0.24 |
|  |  | AAB 10 | 6.6 | 4.1 | 0.08 |
|  | Duste | AADU 1 | 5.1 | 3 | 0.06 |
|  |  | AADU 2 | 3.7 | 7.5 | 0.15 |
|  |  | AADU 3 | 7.3 | 6.6 | 0.13 |
|  |  | AADU 4 | 7.5 | 5.1 | 0.10 |
|  |  | AADU 5 | 7 | 3.7 | 0.07 |
|  |  | AADU 6 | 7.3 | 12.4 | 0.25 |
|  |  | AADU 7 | 4.5 | 13.1 | 0.26 |
|  |  | AADU 8 | 10.2 | 11 | 0.22 |
|  |  | AADU 9 | 7 | 13.1 | 0.26 |
|  |  | AADU 10 | 7.3 | 8.6 | 0.17 |
| Ogun | Ilaro | ETIL 1 | 2.2 | 2.4 | 0.05 |
|  |  | ETIL 2 | 1.9 | 2.2 | 0.04 |
|  |  | ETIL 3 | 3.2 | 3.8 | 0.08 |
|  |  | ETIL 4 | 2.8 | 3.6 | 0.07 |
|  |  | ETIL5 | 2.2 | 2.8 | 0.06 |
|  |  | ETIL 6 | 2.5 | 2.6 | 0.05 |
|  |  | ETIL7 | 3.2 | 6.8 | 0.14 |
|  |  | ETIL 8 | 3.2 | 6.8 | 0.14 |
|  |  | ETIL 9 | 4.5 | 3.4 | 0.07 |
|  |  | ETIL 10 | 3.4 | 2.6 | 0.05 |
|  | Ojaodan | ETOD 1 | 3.6 | 3.5 | 0.07 |
|  |  | ETOD 2 | 4.2 | 7.3 | 0.15 |
|  |  | ETOD 3 | 4.5 | 7.5 | 0.15 |
|  |  | ETOD 4 | 4 | 7 | 0.14 |
|  |  | ETOD 5 | 4 | 6.6 | 0.13 |
|  |  | ETOD 6 | 4.2 | 7 | 0.14 |
|  |  | ETOD 7 | 4.1 | 6.2 | 0.12 |
|  |  | ETOD 8 | 4.6 | 6.8 | 0.14 |
|  |  | ETOD 9 | 4.3 | 7.5 | 0.15 |
|  |  | ETOD 10 | 3.6 | 8.8 | 0.18 |
|  | Imashayi | ETAY 1 | 3.2 | 6.6 | 0.13 |
|  |  | ETAY 2 | 4.6 | 6 | 0.12 |
|  |  | ETAY 3 | 1.6 | 2.4 | 0.05 |
|  |  | ETAY 4 | 1.3 | 2.8 | 0.06 |
|  |  | ETAY 5 | 1.5 | 2.4 | 0.05 |
|  |  | ETAY 6 | 1.2 | 2.6 | 0.05 |
|  |  | ETAY 7 | 1.3 | 2.4 | 0.05 |
|  |  | ETAY 8 | 1.2 | 2.4 | 0.05 |
|  |  | ETAY 9 | 1.2 | 2.5 | 0.05 |
|  |  | ETAY 10 | 1.2 | 2.7 | 0.05 |
|  | Igan Okoto | ETIO 1 | 1.5 | 2.9 | 0.06 |
|  |  | ETIO 2 | 1.6 | 2.4 | 0.05 |
|  |  | ETIO 3 | 1.7 | 2.6 | 0.05 |
|  |  | ETIO 4 | 1.6 | 2.3 | 0.05 |
|  |  | ETIO 5 | 1.4 | 2.4 | 0.05 |
|  |  | ETIO 6 | 1.5 | 2.3 | 0.05 |
|  |  | ETIO 7 | 1.6 | 2.4 | 0.05 |
|  |  | ETIO 8 | 1.8 | 2.4 | 0.05 |
|  |  | ETIO 9 | 1.6 | 2.2 | 0.04 |
|  |  | ETIO 10 | 3.2 | 3.8 | 0.08 |
|  | Ayetoro | ETIM 1 | 2.8 | 3.6 | 0.07 |
|  |  | ETIM 2 | 2.2 | 2.8 | 0.06 |
|  |  | ETIM 3 | 2.5 | 2.6 | 0.05 |
|  |  | ETIM 4 | 3.2 | 6.8 | 0.14 |
|  |  | ETIM 5 | 4.5 | 3.4 | 0.07 |
|  |  | ETIM 6 | 3.4 | 2.6 | 0.05 |
|  |  | ETIM 7 | 3.6 | 3.5 | 0.07 |
|  |  | ETIM 8 | 4.2 | 7.3 | 0.15 |
|  |  | ETIM 9 | 4.5 | 7.5 | 0.15 |
|  |  | ETIM 10 | 4 | 7 | 0.14 |
| Ogun | Kotopo | KMRS 1 | 3.6 | 6.8 | 0.14 |
|  |  | KMRS 2 | 3.2 | 3.4 | 0.07 |
|  | Fajol | FR 1 | 4.6 | 2.6 | 0.05 |
|  |  | FR 2 | 1.6 | 3.5 | 0.07 |
|  | Asero | AF 1 | 1.3 | 2.3 | 0.05 |
|  |  | AF 2 | 3.5 | 3.5 | 0.07 |
|  | Lantoro | LR 1 | 3 | 3 | 0.06 |
|  |  | LR 2 | 2.4 | 3.6 | 0.07 |
|  | Oke-Efon | OD 1 | 3.2 | 3 | 0.06 |
|  |  | OD 2 | 2.1 | 3.2 | 0.06 |
|  | Lafenwa | LNNPC 1 | 2.6 | 3.8 | 0.08 |
|  |  | LNNPC 2 | 2.3 | 4.5 | 0.09 |
|  | Aiyetoro | LMA 1 | 3.6 | 3.8 | 0.08 |
|  |  | LR 1 | 3.2 | 2.6 | 0.05 |
|  | Adigbe | AA 1 | 4.6 | 3 | 0.06 |
|  |  | AA 2 | 1.6 | 2.4 | 0.05 |
|  | Onikoko | AO 1 | 1.3 | 2.8 | 0.06 |
|  |  | AO 2 | 1.5 | 2.4 | 0.05 |
|  | Onikolobo | KF 1 | 1.2 | 2.6 | 0.05 |
|  |  | KF 2 | 1.3 | 2.4 | 0.05 |
| Ogun | Lafenwa/Rounda | A | 8.2 | 11.6 | 0.23 |
|  |  | A i | 5.2 | 3.4 | 0.07 |
|  |  | A ii | 4.3 | 10.4 | 0.21 |
|  |  | B | 8 | 4.5 | 0.09 |
|  |  | B i | 8.6 | 3.7 | 0.07 |
|  |  | C | 12.8 | 9.3 | 0.19 |
|  |  | P | 12.2 | 9.8 | 0.20 |
| Ogun | Itoku | BAIT 1 | 2.2 | 2.4 | 0.05 |
|  |  | BAIT 2 | 1.9 | 2.2 | 0.04 |
|  |  | BAIT 3 | 3.2 | 3.8 | 0.08 |
|  |  | BAIT 4 | 2.8 | 3.6 | 0.07 |
|  |  | BAIT 5 | 2.2 | 2.8 | 0.06 |
|  |  | BAIT 6 | 2.5 | 2.6 | 0.05 |
|  |  | BAIT 7 | 3.2 | 6.8 | 0.14 |
|  |  | BAIT 8 | 3.2 | 6.8 | 0.14 |
|  |  | BAIT 9 | 4.5 | 3.4 | 0.07 |
|  |  | BAIT 10 | 3.4 | 2.6 | 0.05 |
|  | Kugba | BAK1 | 3.6 | 3.5 | 0.07 |
|  |  | BAK 2 | 4.2 | 7.3 | 0.15 |
|  |  | BAK 3 | 4.5 | 7.5 | 0.15 |
|  |  | BAK 4 | 4 | 7 | 0.14 |
|  |  | BAK 5 | 4 | 6.6 | 0.13 |
|  |  | BAK 6 | 4.2 | 7 | 0.14 |
|  |  | BAK 7 | 4.1 | 6.2 | 0.12 |
|  |  | BAK 8 | 4.6 | 6.8 | 0.14 |
|  |  | BAK 9 | 4.3 | 7.5 | 0.15 |
|  |  | BAK 10 | 3.6 | 8.8 | 0.18 |
|  | Okeibukun | BAO 1 | 3.2 | 6.6 | 0.13 |
|  |  | BAO 2 | 4.6 | 6 | 0.12 |
|  |  | BAO 3 | 1.6 | 2.4 | 0.05 |
|  |  | BAO 4 | 1.3 | 2.8 | 0.06 |
|  |  | BAO 5 | 1.5 | 2.4 | 0.05 |
|  |  | BAO 6 | 1.2 | 2.6 | 0.05 |
|  |  | BAO 7 | 1.3 | 2.4 | 0.05 |
|  |  | BAO 8 | 1.2 | 2.4 | 0.05 |
|  |  | BAO 9 | 1.2 | 2.5 | 0.05 |
|  |  | BAO 10 | 1.2 | 2.7 | 0.05 |
|  | Idi Aba | BAID 1 | 1.5 | 2.9 | 0.06 |
|  |  | BAID 2 | 1.6 | 2.4 | 0.05 |
|  |  | BAID 3 | 1.7 | 2.6 | 0.05 |
|  |  | BAID 4 | 1.6 | 2.3 | 0.05 |
|  |  | BAID 5 | 1.4 | 2.4 | 0.05 |
|  |  | BAID 6 | 1.5 | 2.3 | 0.05 |
|  |  | BAID 7 | 1.6 | 2.4 | 0.05 |
|  |  | BAID 8 | 1.8 | 2.4 | 0.05 |
|  |  | BAID 9 | 1.6 | 2.2 | 0.04 |
|  |  | BAID10 | 3.2 | 3.8 | 0.08 |
|  | Lafenwa | BAL1 | 2.8 | 3.6 | 0.07 |
|  |  | BAL 2 | 2.2 | 2.8 | 0.06 |
|  |  | BAL 3 | 2.5 | 2.6 | 0.05 |
|  |  | BAL 4 | 3.2 | 6.8 | 0.14 |
|  |  | BAL 5 | 4.5 | 3.4 | 0.07 |
|  |  | BAL 6 | 3.4 | 2.6 | 0.05 |
|  |  | BAL 7 | 3.6 | 3.5 | 0.07 |
|  |  | BAL 8 | 4.2 | 7.3 | 0.15 |
|  |  | BAL 9 | 4.5 | 7.5 | 0.15 |
|  |  | BAL 10 | 4 | 7 | 0.14 |
| Osun | Ejigbo | GTWEJ 1 | 6.4 | 12.4 | 0.25 |
|  |  | GTWEJ 2 | 7 | 13.1 | 0.26 |
|  |  | GTWEJ 3 | 10.2 | 12.4 | 0.25 |
|  |  | GTWEJ 4 | 7 | 13.1 | 0.26 |
|  |  | GTWEJ 5 | 7.3 | 11 | 0.22 |
|  |  | GTWEJ 6 | 4.5 | 13.1 | 0.26 |
|  |  | GTWEJ 7 | 4.1 | 8.6 | 0.17 |
|  |  | GTWEJ 8 | 3 | 9.5 | 0.19 |
|  |  | GTWEJ 9 | 7.5 | 12 | 0.24 |
|  |  | GTWEJ 10 | 6.6 | 4.1 | 0.08 |
|  | Osogbo | GTWO 1 | 5.1 | 3 | 0.06 |
|  |  | GTWO 2 | 3.7 | 7.5 | 0.15 |
|  |  | GTWO 3 | 7.3 | 6.6 | 0.13 |
|  |  | GTWO 4 | 7.5 | 5.1 | 0.10 |
|  |  | GTWO 5 | 7 | 3.7 | 0.07 |
|  |  | GTWO 6 | 7.3 | 12.4 | 0.25 |
|  |  | GTWO 7 | 4.5 | 13.1 | 0.26 |
|  |  | GTWO 8 | 10.2 | 11 | 0.22 |
|  |  | GTWO 9 | 7 | 13.1 | 0.26 |
|  |  | GTWO 10 | 7.3 | 8.6 | 0.17 |
|  | Ikirun | GTWIK 1 | 4.5 | 9.5 | 0.19 |
|  |  | GTWIK 2 | 4.1 | 12 | 0.24 |
|  |  | GTWIK 3 | 3 | 4.1 | 0.08 |
|  |  | GTWIK 4 | 7.5 | 3 | 0.06 |
|  |  | GTWIK 5 | 6.6 | 7.5 | 0.15 |
|  |  | GTWIK 6 | 5.1 | 6.7 | 0.13 |
|  |  | GTWIK 7 | 3.7 | 5.8 | 0.12 |
|  |  | GTWIK 8 | 7.3 | 6.4 | 0.13 |
|  |  | GTWIK 9 | 7.5 | 8.12 | 0.16 |
|  |  | GTWIK 10 | 7 | 10.04 | 0.20 |
|  | Ilobu | GTWIL 1 | 6.4 | 12.4 | 0.25 |
|  |  | GTWIL 2 | 7 | 13.1 | 0.26 |
|  |  | GTWIL 3 | 10.2 | 12.4 | 0.25 |
|  |  | GTWIL 4 | 7 | 13.1 | 0.26 |
|  |  | GTWIL 5 | 7.3 | 11 | 0.22 |
|  |  | GTWIL 6 | 4.5 | 13.1 | 0.26 |
|  |  | GTWIL 7 | 4.1 | 8.6 | 0.17 |
|  |  | GTWIL 8 | 3 | 9.5 | 0.19 |
|  |  | GTWIL 9 | 7.5 | 12 | 0.24 |
|  |  | GTWIL 10 | 6.6 | 4.1 | 0.08 |
|  | Ede | GTWE 1 | 5.1 | 3 | 0.06 |
|  |  | GTWE 2 | 3.7 | 7.5 | 0.15 |
|  |  | GTWE 3 | 7.3 | 6.6 | 0.13 |
|  |  | GTWE 4 | 7.5 | 5.1 | 0.10 |
|  |  | GTWE 5 | 7 | 3.7 | 0.07 |
|  |  | GTWE 6 | 7.3 | 12.4 | 0.25 |
|  |  | GTWE 7 | 4.5 | 13.1 | 0.26 |
|  |  | GTWE 8 | 10.2 | 11 | 0.22 |
|  |  | GTWE 9 | 7 | 13.1 | 0.26 |
|  |  | GTWE 10 | 7.3 | 8.6 | 0.17 |
| Ekiti | Ariyasi | OAR 1 | 3.6 | 6.8 | 0.14 |
|  |  | OAR 2 | 3.2 | 3.4 | 0.07 |
|  |  | OAR 3 | 4.6 | 2.6 | 0.05 |
|  |  | OAR 4 | 1.6 | 3.5 | 0.07 |
|  |  | OAR 5 | 1.3 | 2.3 | 0.05 |
|  |  | OAR 6 | 3.5 | 3.5 | 0.07 |
|  |  | OAR 7 | 3 | 3 | 0.06 |
|  |  | OAR 8 | 2.4 | 3.6 | 0.07 |
|  |  | OAR 9 | 3.2 | 3 | 0.06 |
|  |  | OAR 10 | 2.1 | 3.2 | 0.06 |
|  | Ogbontioro | OOG 1 | 2.6 | 3.8 | 0.08 |
|  |  | OOG 2 | 2.3 | 4.5 | 0.09 |
|  |  | OOG 3 | 3.6 | 3.8 | 0.08 |
|  |  | OOG 4 | 3.2 | 2.6 | 0.05 |
|  |  | OOG 5 | 4.6 | 3 | 0.06 |
|  |  | OOG 6 | 1.6 | 2.4 | 0.05 |
|  |  | OOG 7 | 1.3 | 2.8 | 0.06 |
|  |  | OOG 8 | 1.5 | 2.4 | 0.05 |
|  |  | OOG 9 | 1.2 | 2.6 | 0.05 |
|  |  | OOG 10 | 1.3 | 2.4 | 0.05 |
|  | Idamudu | OID 1 | 1.2 | 2.4 | 0.05 |
|  |  | OID 2 | 1.2 | 2.5 | 0.05 |
|  |  | OID 3 | 1.2 | 2.7 | 0.05 |
|  |  | OID 4 | 2.4 | 3.5 | 0.07 |
|  |  | OID 5 | 2.4 | 2.5 | 0.05 |
|  |  | OID 6 | 2.5 | 2.3 | 0.05 |
|  |  | OID 7 | 2.7 | 2 | 0.04 |
|  |  | OID 8 | 3.6 | 6.8 | 0.14 |
|  |  | OID 9 | 3.2 | 3.4 | 0.07 |
|  |  | OID 10 | 1.2 | 2.7 | 0.05 |
|  | Odo-Emure | OOD 1 | 3.6 | 6.8 | 0.14 |
|  |  | OOD 2 | 3.2 | 3.4 | 0.07 |
|  |  | OOD 3 | 4.6 | 2.6 | 0.05 |
|  |  | OOD 4 | 1.6 | 3.5 | 0.07 |
|  |  | OOD 5 | 1.3 | 2.3 | 0.05 |
|  |  | OOD 6 | 3.5 | 3.5 | 0.07 |
|  |  | OOD 7 | 3 | 3 | 0.06 |
|  |  | OOD 8 | 2.4 | 3.6 | 0.07 |
|  |  | OOD 9 | 3.2 | 3 | 0.06 |
|  |  | OOD 10 | 2.1 | 3.2 | 0.06 |
|  | Oke-Emure | OOK 1 | 2.6 | 3.8 | 0.08 |
|  |  | OOK 2 | 2.3 | 4.5 | 0.09 |
|  |  | OOK 3 | 3.6 | 3.8 | 0.08 |
|  |  | OOK 4 | 3.2 | 2.6 | 0.05 |
|  |  | OOK 5 | 4.6 | 3 | 0.06 |
|  |  | OOK 6 | 1.6 | 2.4 | 0.05 |
|  |  | OOK 7 | 1.3 | 2.8 | 0.06 |
|  |  | OOK 8 | 1.5 | 2.4 | 0.05 |
|  |  | OOK 9 | 1.2 | 2.6 | 0.05 |
|  |  | OOK 10 | 4 | 4 | 0.08 |
| Lagos | Badia | OE BD 1 | 2.2 | 2.4 | 0.05 |
|  |  | OE BD 2 | 1.9 | 2.2 | 0.04 |
|  |  | OE BD 3 | 3.2 | 3.8 | 0.08 |
|  |  | OE BD 4 | 2.8 | 3.6 | 0.07 |
|  |  | OE BD 5 | 2.2 | 2.8 | 0.06 |
|  |  | OE BD 6 | 2.5 | 2.6 | 0.05 |
|  |  | OE BD 7 | 3.2 | 6.8 | 0.14 |
|  |  | OE BD 8 | 3.2 | 6.8 | 0.14 |
|  |  | OE BD 9 | 4.5 | 3.4 | 0.07 |
|  |  | OE BD 10 | 3.4 | 2.6 | 0.05 |
|  | Makoko | OE MK 1 | 3.6 | 3.5 | 0.07 |
|  |  | OE MK 2 | 4.2 | 7.3 | 0.15 |
|  |  | OE MK 3 | 4.5 | 7.5 | 0.15 |
|  |  | OE MK 4 | 4 | 7 | 0.14 |
|  |  | OE MK 5 | 4 | 6.6 | 0.13 |
|  |  | OE MK 6 | 4.2 | 7 | 0.14 |
|  |  | OE MK 7 | 4.1 | 6.2 | 0.12 |
|  |  | OE MK 8 | 4.6 | 6.8 | 0.14 |
|  |  | OE MK 9 | 4.3 | 7.5 | 0.15 |
|  |  | OE MK 10 | 3.6 | 8.8 | 0.18 |
|  | Agege | OE AG 1 | 3.2 | 6.6 | 0.13 |
|  |  | OE AG 2 | 4.6 | 6 | 0.12 |
|  |  | OE AG 3 | 1.6 | 2.4 | 0.05 |
|  |  | OE AG 4 | 1.3 | 2.8 | 0.06 |
|  |  | OE AG 5 | 1.5 | 2.4 | 0.05 |
|  | Bariga | OE Ba 1 | 1.2 | 2.6 | 0.05 |
|  |  | OE Ba 2 | 1.3 | 2.4 | 0.05 |
|  |  | OE Ba 3 | 1.2 | 2.4 | 0.05 |
|  |  | OE Ba 4 | 1.2 | 2.5 | 0.05 |
|  |  | OE Ba 5 | 1.2 | 2.7 | 0.05 |
|  | Ajegunle | OE Aje 1 | 1.5 | 2.9 | 0.06 |
|  |  | OE Aje 2 | 1.6 | 2.4 | 0.05 |
|  |  | OE Aje 3 | 1.7 | 2.6 | 0.05 |
|  |  | OE Aje 4 | 1.6 | 2.3 | 0.05 |
|  |  | OE Aje 5 | 1.4 | 2.4 | 0.05 |
|  | Mushin | OE Mu 1 | 1.5 | 2.3 | 0.05 |
|  |  | OE Mu 2 | 1.6 | 2.4 | 0.05 |
|  |  | OE Mu 3 | 1.8 | 2.4 | 0.05 |
|  |  | OE Mu 4 | 1.6 | 2.2 | 0.04 |
|  |  | OE Mu 5 | 3.2 | 3.8 | 0.08 |
|  | Oshodi | OE Os 1 | 2.8 | 3.6 | 0.07 |
|  |  | OE Os 2 | 2.2 | 2.8 | 0.06 |
|  |  | OE Os 3 | 2.5 | 2.6 | 0.05 |
|  |  | OE Os 4 | 3.2 | 6.8 | 0.14 |
|  |  | OE Os 5 | 4.5 | 3.4 | 0.07 |
|  | Amukoko | OE Amu 1 | 3.4 | 2.6 | 0.05 |
|  |  | OE Amu 2 | 3.6 | 3.5 | 0.07 |
|  |  | OE Amu 3 | 4.2 | 7.3 | 0.15 |
|  |  | OE Amu 4 | 4.5 | 7.5 | 0.15 |
|  |  | OE Amu 5 | 4 | 7 | 0.14 |
| Lagos | Aiyetoro | AY 1 | 2.2 | 2.4 | 0.05 |
|  |  | AY 2 | 1.9 | 2.2 | 0.04 |
|  |  | AY 3 | 3.2 | 3.8 | 0.08 |
|  |  | AY 4 | 2.8 | 3.6 | 0.07 |
|  |  | AY 5 | 2.2 | 2.8 | 0.06 |
|  |  | AY 6 | 2.5 | 2.6 | 0.05 |
|  |  | AY 7 | 3.2 | 6.8 | 0.14 |
|  |  | AY 8 | 3.2 | 6.8 | 0.14 |
|  | Iraye | IR 1 | 4.5 | 3.4 | 0.07 |
|  |  | IR 2 | 3.4 | 2.6 | 0.05 |
|  |  | IR 3 | 3.6 | 3.5 | 0.07 |
|  | Odomola | OD 1 | 4.2 | 7.3 | 0.15 |
|  |  | OD 2 | 4.5 | 7.5 | 0.15 |
|  |  | OD 3 | 4 | 7 | 0.14 |
|  |  | OD 4 | 4 | 6.6 | 0.13 |
|  | Mojoda | MJ 1 | 4.2 | 7 | 0.14 |
|  |  | MJ 2 | 4.1 | 6.2 | 0.12 |
|  |  | MJ 3 | 4.6 | 6.8 | 0.14 |
|  |  | MJ 4 | 4.3 | 7.5 | 0.15 |
|  |  | MJ 5 | 3.6 | 8.8 | 0.18 |
|  |  | MJ 6 | 3.2 | 6.6 | 0.13 |
|  |  | MJ 7 | 4.6 | 6 | 0.12 |
|  |  | MJ 8 | 1.6 | 2.4 | 0.05 |
|  |  | MJ 9 | 1.3 | 2.8 | 0.06 |
|  | Ilara | IL 1 | 1.5 | 2.4 | 0.05 |
|  |  | IL 2 | 1.2 | 2.6 | 0.05 |
|  |  | IL 3 | 1.3 | 2.4 | 0.05 |
|  |  | IL 4 | 1.2 | 2.4 | 0.05 |
|  |  | IL 5 | 1.2 | 2.5 | 0.05 |
|  |  | IL 6 | 1.2 | 2.7 | 0.05 |
|  | Poka | PK 1 | 1.5 | 2.9 | 0.06 |
|  |  | PK 2 | 1.6 | 2.4 | 0.05 |
|  |  | PK 3 | 1.7 | 2.6 | 0.05 |
|  |  | PK 4 | 1.6 | 2.3 | 0.05 |
|  | Odo-Iragushi | OIR 1 | 1.4 | 2.4 | 0.05 |
|  |  | OIR 2 | 1.5 | 2.3 | 0.05 |
|  |  | OIR 3 | 1.6 | 2.4 | 0.05 |
|  |  | OIR 4 | 1.8 | 2.4 | 0.05 |
|  |  | OIR 5 | 1.6 | 2.2 | 0.04 |
|  |  | OIR 6 | 3.2 | 3.8 | 0.08 |
|  | Eredo | ER 1 | 2.8 | 3.6 | 0.07 |
|  |  | ER 2 | 2.2 | 2.8 | 0.06 |
|  |  | ER 3 | 2.5 | 2.6 | 0.05 |
|  |  | ER 4 | 3.2 | 6.8 | 0.14 |
|  |  | ER 5 | 4.5 | 3.4 | 0.07 |
|  |  | ER 6 | 3.4 | 2.6 | 0.05 |
|  |  | ER 7 | 3.6 | 3.5 | 0.07 |
|  |  | ER 8 | 4.2 | 7.3 | 0.15 |
|  |  | ER 9 | 4.5 | 7.5 | 0.15 |
|  |  | ER 10 | 4 | 7 | 0.14 |
| Ondo | ODODE IDANRE | OOD1c | 6.4 | 12.4 | 0.25 |
|  |  | OOD2c | 7 | 13.1 | 0.26 |
|  |  | OOD3c | 10.2 | 12.4 | 0.25 |
|  |  | OOD4c | 7 | 13.1 | 0.26 |
|  |  | OOD5c | 7.3 | 11 | 0.22 |
|  |  | OOD6c | 4.5 | 13.1 | 0.26 |
|  |  | OOD7c | 4.1 | 8.6 | 0.17 |
|  |  | OOD8c | 3 | 9.5 | 0.19 |
|  |  | OOD9c | 7.5 | 12 | 0.24 |
|  |  | OOD10c | 6.6 | 4.1 | 0.08 |
|  | ALADE IDANRE | OOA1c | 5.1 | 3 | 0.06 |
|  |  | OOA2c | 3.7 | 7.5 | 0.15 |
|  |  | OOA3c | 7.3 | 6.6 | 0.13 |
|  |  | OOA4c | 7.5 | 5.1 | 0.10 |
|  |  | OOA5c | 7 | 3.7 | 0.07 |
|  |  | OOA6c | 7.3 | 12.4 | 0.25 |
|  |  | OOA7c | 4.5 | 13.1 | 0.26 |
|  |  | OOA8c | 10.2 | 11 | 0.22 |
|  |  | OOA9c | 7 | 13.1 | 0.26 |
|  |  | OOA10c | 7.3 | 8.6 | 0.17 |
|  | AKURE | OOAK1c | 4.5 | 9.5 | 0.19 |
|  |  | OOAK2c | 4.1 | 12 | 0.24 |
|  |  | OOAK3c | 3 | 4.1 | 0.08 |
|  |  | OOAK4c | 7.5 | 3 | 0.06 |
|  |  | OOAK5c | 6.6 | 7.5 | 0.15 |
|  |  | OOAK6c | 5.1 | 6.7 | 0.13 |
|  |  | OOAK7c | 3.7 | 5.8 | 0.12 |
|  |  | OOAK8c | 7.3 | 6.4 | 0.13 |
|  |  | OOAK9c | 7.5 | 8.12 | 0.16 |
|  |  | OOAK10c | 7 | 10.04 | 0.20 |
|  |  | OOAK11c | 6.4 | 12.4 | 0.25 |
|  |  | OOAK12c | 7 | 13.1 | 0.26 |
|  |  | OOAK13c | 10.2 | 12.4 | 0.25 |
|  |  | OOAK14c | 17 | 22.6 | 0.45 |
|  |  | OOAK15c | 7.3 | 11 | 0.22 |
|  |  | OOAK16c | 4.5 | 13.1 | 0.26 |
|  |  | OOAK17c | 4.1 | 8.6 | 0.17 |
|  |  | OOAK18c | 3 | 9.5 | 0.19 |
|  |  | OOAK19c | 7.5 | 12 | 0.24 |
|  |  | OOAK20c | 6.6 | 4.1 | 0.08 |
|  |  | OOAK21c | 5.1 | 3 | 0.06 |
|  |  | OOAK22c | 3.7 | 7.5 | 0.15 |
|  |  | OOAK23c | 7.3 | 6.6 | 0.13 |
|  |  | OOAK24c | 7.5 | 5.1 | 0.10 |
|  |  | OOAK25c | 7 | 3.7 | 0.07 |
|  |  | OOAK26c | 7.3 | 12.4 | 0.25 |
|  |  | OOAK27c | 4.5 | 13.1 | 0.26 |
|  |  | OOAK28c | 10.2 | 11 | 0.22 |
|  |  | OOAK29c | 7 | 13.1 | 0.26 |
|  |  | OOAK30c | 7.3 | 8.6 | 0.17 |
| Oyo | Oyo | OWO 1 | 2.4 | 2.4 | 0.05 |
|  |  | OWO 2 | 2.6 | 2.4 | 0.05 |
|  |  | AL 1 | 2.6 | 2.8 | 0.06 |
|  |  | AL 2 | 2.8 | 3.6 | 0.07 |
|  |  | ROY 1 | 2.2 | 2.8 | 0.06 |
|  |  | ROY 2 | 2.5 | 2.6 | 0.05 |
|  |  | AR 1 | 3.2 | 6.8 | 0.14 |
|  |  | AK 1 | 4.5 | 3.4 | 0.07 |
|  |  | AK 2 | 3.4 | 2.6 | 0.05 |
|  |  | AK 3 | 3.6 | 3.5 | 0.07 |
|  | Awe | ISA 1 | 4.2 | 7.3 | 0.15 |
|  |  | ISA 2 | 4.5 | 7.5 | 0.15 |
|  |  | ISA 3 | 4 | 7 | 0.14 |
|  |  | ORA 1 | 4 | 6.6 | 0.13 |
|  |  | ORA 2 | 4.2 | 7 | 0.14 |
|  |  | BA 1 | 4.1 | 6.2 | 0.12 |
|  |  | BA 2 | 4.6 | 6.8 | 0.14 |
|  |  | OK 1 | 4.3 | 7.5 | 0.15 |
|  |  | OK 2 | 3.6 | 8.8 | 0.18 |
|  |  | OK 3 | 3.2 | 6.6 | 0.13 |
|  | Akinmorin | ARA 1 | 4.6 | 6 | 0.12 |
|  |  | ARA 2 | 1.6 | 2.4 | 0.05 |
|  |  | ARA 3 | 1.3 | 2.8 | 0.06 |
|  |  | OKE 1 | 1.5 | 2.4 | 0.05 |
|  |  | OKE 2 | 1.2 | 2.6 | 0.05 |
|  |  | OKE 3 | 1.3 | 2.4 | 0.05 |
|  |  | OKE 4 | 1.2 | 2.4 | 0.05 |
|  |  | BAA 1 | 1.2 | 2.5 | 0.05 |
|  |  | BAA 2 | 1.2 | 2.7 | 0.05 |
|  |  | BAA 3 | 2.4 | 2.4 | 0.05 |
|  | Ilora | OY 1 | 2.6 | 2.4 | 0.05 |
|  |  | OY 2 | 2.6 | 2.8 | 0.06 |
|  |  | IL 1 | 2.8 | 3.6 | 0.07 |
|  |  | IL 2 | 2.2 | 2.8 | 0.06 |
|  |  | AG 1 | 2.5 | 2.6 | 0.05 |
|  |  | AG 2 | 3.2 | 6.8 | 0.14 |
|  |  | AG 3 | 4.5 | 3.4 | 0.07 |
|  |  | AK 1 | 3.4 | 2.6 | 0.05 |
|  |  | AK 2 | 3.6 | 3.5 | 0.07 |
|  |  | AK 3 | 4.2 | 7.3 | 0.15 |
|  | Ogbomosho | OS 1 | 4.5 | 7.5 | 0.15 |
|  |  | OS 2 | 4 | 7 | 0.14 |
|  |  | AJ 1 | 4 | 6.6 | 0.13 |
|  |  | AJ 2 | 4.2 | 7 | 0.14 |
|  |  | OKA 1 | 4.1 | 6.2 | 0.12 |
|  |  | OKA 2 | 4.6 | 6.8 | 0.14 |
|  |  | OKA 3 | 4.3 | 7.5 | 0.15 |
|  |  | TAK 1 | 3.6 | 8.8 | 0.18 |
|  |  | TAK 2 | 3.4 | 2.6 | 0.05 |
|  |  | TAK 3 | 3.6 | 3.5 | 0.07 |
| Imo | Amanator | AM 1 | 3.2 | 3.9 | 0.08 |
|  |  | AM 2 | 2.2 | 2.8 | 0.06 |
|  |  | AM 3 | 2.5 | 2.6 | 0.05 |
|  |  | AM 4 | 3.2 | 6.8 | 0.14 |
|  | Awalla | AW 1 | 4.5 | 3.4 | 0.07 |
|  |  | AW 2 | 3.4 | 2.6 | 0.05 |
|  |  | AW 3 | 3.6 | 3.5 | 0.07 |
|  |  | AW 4 | 4.2 | 7.3 | 0.15 |
|  | Dikenafai | DK 1 | 4.5 | 7.5 | 0.15 |
|  |  | DK 2 | 4 | 7 | 0.14 |
|  |  | DK 3 | 2.6 | 7.3 | 0.15 |
|  |  | DK 4 | 2.8 | 4.5 | 0.09 |
|  | Isikenesi | IS 1 | 2.2 | 4.1 | 0.08 |
|  |  | IS 2 | 2.5 | 3 | 0.06 |
|  |  | IS 3 | 4.3 | 7.5 | 0.15 |
|  |  | IS 4 | 4.7 | 6.8 | 0.14 |
|  | Okowele | OK 1 | 3.9 | 9.2 | 0.18 |
|  |  | OK 2 | 3.2 | 3.9 | 0.08 |
|  |  | OK 3 | 2.2 | 2.8 | 0.06 |
|  |  | OK 4 | 2.5 | 2.6 | 0.05 |
|  | Umu-Akam | UA 1 | 3.2 | 6.8 | 0.14 |
|  |  | UA 2 | 4.5 | 3.4 | 0.07 |
|  |  | UA 3 | 3.4 | 2.6 | 0.05 |
|  |  | UA 4 | 3.6 | 3.5 | 0.07 |
|  | Umu-Eshi | UE 1 | 4.2 | 7.3 | 0.15 |
|  |  | UE 2 | 4.5 | 7.5 | 0.15 |
|  |  | UE 3 | 4 | 7 | 0.14 |
|  |  | UE 4 | 2.6 | 7.3 | 0.15 |
|  | Umu-Obom | UO 1 | 2.8 | 4.5 | 0.09 |
|  |  | UO 2 | 2.2 | 4.1 | 0.08 |
|  |  | UO 3 | 2.5 | 3 | 0.06 |
|  |  | UO 4 | 4.3 | 7.5 | 0.15 |
| Ebonyi | Amegu | AM1 | 3.2 | 9 | 0.18 |
|  |  | AM2 | 2.4 | 6.8 | 0.14 |
|  |  | AM3 | 2.6 | 5.8 | 0.12 |
|  |  | AM4 | 2.6 | 7.3 | 0.15 |
|  |  | AM5 | 2.8 | 4.5 | 0.09 |
|  |  | AM6 | 2.2 | 4.1 | 0.08 |
|  |  | AM7 | 2.5 | 3 | 0.06 |
|  |  | AM8 | 3.2 | 3.9 | 0.08 |
|  |  | AM9 | 4.5 | 3.4 | 0.07 |
|  | Nkaliki | NK1 | 3.4 | 2.6 | 0.05 |
|  |  | NK2 | 3.6 | 3.5 | 0.07 |
|  |  | NK3 | 4.2 | 7.3 | 0.15 |
|  |  | NK4 | 4.5 | 7.5 | 0.15 |
|  |  | NK5 | 4 | 7 | 0.14 |
|  |  | NK6 | 4 | 6.6 | 0.13 |
|  |  | NK7 | 4.2 | 7 | 0.14 |
|  |  | NK8 | 4.1 | 6.2 | 0.12 |
|  |  | NK9 | 4.6 | 6.8 | 0.14 |
|  | Mgbabor | MG1 | 4.3 | 7.5 | 0.15 |
|  |  | MG2 | 3.6 | 8.8 | 0.18 |
|  |  | MG3 | 3.2 | 6.6 | 0.13 |
|  |  | MG4 | 4.6 | 6 | 0.12 |
|  |  | MG5 | 3.2 | 2.4 | 0.05 |
|  |  | MG6 | 8.6 | 2.8 | 0.06 |
|  |  | MG7 | 5.3 | 2.4 | 0.05 |
|  |  | MG8 | 8.9 | 2.6 | 0.05 |
|  |  | MG9 | 8 | 2.4 | 0.05 |
|  | Oriuzo | OR1 | 5 | 2.4 | 0.05 |
|  |  | OR2 | 8 | 2.5 | 0.05 |
|  |  | OR3 | 3.2 | 2.7 | 0.05 |
|  |  | OR4 | 8.6 | 2.9 | 0.06 |
|  |  | OR5 | 11.6 | 2.4 | 0.05 |
|  |  | OR6 | 10.7 | 2.6 | 0.05 |
|  |  | OR7 | 1.6 | 2.3 | 0.05 |
|  |  | OR8 | 1.4 | 2.4 | 0.05 |
|  |  | OR9 | 1.5 | 2.3 | 0.05 |
|  | Okposhi | OK1 | 1.6 | 2.4 | 0.05 |
|  |  | OK2 | 1.8 | 2.4 | 0.05 |
|  |  | OK3 | 1.6 | 2.2 | 0.04 |
|  |  | OK4 | 3.2 | 3.8 | 0.08 |
|  |  | OK5 | 8.6 | 3.5 | 0.07 |
|  |  | OK6 | 5.3 | 2.4 | 0.05 |
|  |  | OK7 | 8.9 | 2.4 | 0.05 |
|  |  | OK8 | 8 | 2.8 | 0.06 |
|  |  | OK9 | 5 | 3.6 | 0.07 |
|  | Umu Ezeokoha | UM1 | 8 | 2.8 | 0.06 |
|  |  | UM2 | 6.6 | 2.6 | 0.05 |
|  |  | UM3 | 3.4 | 6.8 | 0.14 |
|  |  | UM4 | 3.6 | 9.6 | 0.19 |
|  |  | UM5 | 4.2 | 5.5 | 0.11 |
|  |  | UM6 | 4.5 | 6 | 0.12 |
|  |  | UM7 | 4 | 6.8 | 0.14 |
|  |  | UM8 | 4 | 4.5 | 0.09 |
|  |  | UM9 | 4.2 | 5 | 0.10 |
| Delta | Udu | UD1 | 3.6 | 6.8 | 0.14 |
|  |  | UD2 | 3.2 | 3.4 | 0.07 |
|  |  | UD3 | 4.6 | 2.6 | 0.05 |
|  |  | UD4 | 1.6 | 3.5 | 0.07 |
|  |  | UD5 | 1.3 | 2.3 | 0.05 |
|  |  | UD6 | 3.5 | 3.5 | 0.07 |
|  |  | UD7 | 3 | 3 | 0.06 |
|  |  | UD8 | 2.4 | 3.6 | 0.07 |
|  |  | UD9 | 3.2 | 3 | 0.06 |
|  |  | UD10 | 2.1 | 3.2 | 0.06 |
|  | Ovwian | OV1 | 2.6 | 3.8 | 0.08 |
|  |  | OV2 | 2.3 | 4.5 | 0.09 |
|  |  | OV3 | 3.6 | 3.8 | 0.08 |
|  |  | OV4 | 3.2 | 2.6 | 0.05 |
|  |  | OV5 | 4.6 | 3 | 0.06 |
|  | Delta Steel Company | DSC1 | 1.6 | 2.4 | 0.05 |
|  |  | DSC2 | 1.3 | 2.8 | 0.06 |
|  |  | DSC3 | 1.5 | 2.4 | 0.05 |
|  |  | DSC4 | 1.2 | 2.6 | 0.05 |
|  |  | DSC5 | 1.3 | 2.4 | 0.05 |
|  | Kurutie | KUR1 | 3.9 | 76.2 | 1.52 |
|  |  | KUR2 | 3.6 | 63.5 | 1.27 |
|  | Kunukunuma | KUN1 | 4.6 | 62.3 | 1.25 |
|  |  | KUN2 | 1.6 | 63.6 | 1.27 |
|  |  | KUN3 | 1.3 | 62.8 | 1.26 |
|  | Okerenkoko | OKE1 | 3.5 | 63.5 | 1.27 |
|  |  | OKE2 | 3 | 63 | 1.26 |
|  |  | OKE3 | 2.4 | 63.6 | 1.27 |
|  |  | OKE4 | 3.2 | 63 | 1.26 |
|  |  | OKE5 | 2.1 | 63.2 | 1.26 |
|  |  | OKE6 | 2.6 | 73.8 | 1.48 |
|  |  | OKE7 | 2.3 | 34.5 | 0.69 |
|  |  | OKE8 | 3.6 | 63.8 | 1.28 |
|  |  | OKE9 | 3.2 | 72.6 | 1.45 |
|  |  | OKE10 | 4.6 | 73 | 1.46 |
|  |  | OKE11 | 1.6 | 62.4 | 1.25 |
|  |  | OKE12 | 1.3 | 52.8 | 1.06 |
|  |  | OKE13 | 1.5 | 62.4 | 1.25 |
|  |  | OKE14 | 1.2 | 55.6 | 1.11 |
|  |  | OKE15 | 1.3 | 72.4 | 1.45 |
|  | Enerhen | EN1 | 3 | 13 | 0.26 |
|  |  | EN2 | 2.4 | 13.6 | 0.27 |
|  |  | EN3 | 3.2 | 13 | 0.26 |
|  |  | EN4 | 2.1 | 13.2 | 0.26 |
|  |  | EN5 | 2.6 | 13.8 | 0.28 |
|  | Effurun | EF1 | 3.5 | 13.5 | 0.27 |
|  |  | EF2 | 3 | 13 | 0.26 |
|  |  | EF3 | 2.4 | 13.6 | 0.27 |
|  |  | EF4 | 3.2 | 13 | 0.26 |
|  |  | EF5 | 2.1 | 13.2 | 0.26 |
|  |  | EF6 | 2.6 | 13.8 | 0.28 |
|  |  | EF7 | 2.3 | 14.5 | 0.29 |
|  |  | EF8 | 3.6 | 13.8 | 0.28 |
|  |  | EF9 | 3.2 | 12.6 | 0.25 |
|  |  | EF10 | 4.6 | 13 | 0.26 |
|  |  | EF11 | 3 | 13 | 0.26 |
|  |  | EF12 | 2.4 | 13.6 | 0.27 |
|  |  | EF13 | 3.2 | 13 | 0.26 |
|  |  | EF14 | 2.1 | 13.2 | 0.26 |
|  |  | EF15 | 2.6 | 13.8 | 0.28 |

Table S2: Standard values for calculating chronic daily intake of nitrate and fluoride

| **Exposure factors** | **Units** | **Adults**  **(Above 19 yrs)** | **Teenagers**  **(13 - 19 yrs)** | **Children**  **(1 - 12 yrs)** | **Infants**  **(Under 1yr)** |
| --- | --- | --- | --- | --- | --- |
| Concentration of rare earth elements in water | mg/L | - | - | - | - |
| Exposure frequency (EF) | days/year | 365 a | 365 a | 365 a | 365 a |
| Ingestion rate (IR) | L/day | 2.6 b | 1.8 b | 1 c | 0.5 c |
| Exposure duration (ED) | years | 54 d | 19 | 12 | 1 |
| Average Body weight (BW) | kg | 64 e | 34 f | 23 g | 8.5 h |
| Skin Surface Area (SA) | cm2 | 19652 i | 16900 j | 6365 i | 5950 (700 cm2/kg * 8.5kg) k |
| Bathing Frequency (BF) | times/day | 1 l | 1 l | 1 l | 1 l |
| Unit Conversion Factor (CF) | L/cm3 | 0.002 l | 0.002 l | 0.002 l | 0.002 l |
| Dermal Absorption Parameter (Ki) | cm/h | 0.001 l | 0.001 l | 0.001 l | 0.001 l |
| Average Time of Exposure (AT) - (ED x 365) | days | 19710 | 6935 | 4380 | 365 |

aEmmanuel *et al*. (2022); bInstitute of Medicine (2005)/Marcin (2025); cAdesiyan *et al*. 2018); dThe World Bank Group (2025)/Obokoh (2025); eIgiri *et al*. (2008)/Akinpelu *et al*. (2015); fAyoola *et al*. (2009); gUS Centers of Disease Control and Prevention (2024a)/Family Practice Notebook (2025); hUS Centers of Disease Control and Prevention (2024b)/HealthLine Media, (2025); iOkafor *et al*. (2023); jAlvear-Vasquez *et al*. (2023); kSarkar *et al*. (2010); lYang *et al*. (2012)

Table S3: Standard Reference dose values of fluoride and nitrate in water for oral ingestion and dermal exposure pathways

| **S/N** | **F** | |  | **NO3** | | | **Author** |
| --- | --- | --- | --- | --- | --- | --- | --- |
| **Oral** | **Dermal** |  | **Oral** |  | **Dermal** |
| 1 | 0.06 | NA |  | 1.6 |  | NA | Abdipour et al. (2025) |
| 2 | 0.06 | 0.06 |  | NA |  | NA | Abera et al. (2025) |
| 3 | NA | NA |  | 1.6 |  | NA | Devic et al. (2024) |
| 4 | 0.06 | NA |  | 1.6 |  | NA | Alharbi and El-Sorogy (2023 |
| 5 | 0.06 | 0.06 |  | NA |  | NA | García-Montiel et al. (2023) |
| 6 | 0.04 | 0.04 |  | NA |  | NA | Neshat et al. (2023) |
| 7 | 0.06 | NA |  | NA |  | NA | Sanou et al. (2022) |
| 8 | NA | NA |  | 1.6 |  | 0.8 | Tian et al. (2019) |
| 9 | 0.06 | 0.06 |  | NA |  | NA | Emenike et al. (2018) |
| 10 | 0.1 | NA |  | 1.6 |  | 0.8 | Yang et al. (2012) |
| **11** | **0.06** | **0.06** |  | **1.6** |  | **0.8** | **This Study** |

Where: NA = Not Available
